# Supplementary material for: Possible Combined Effects of Plasma Folate Levels, Global DNA Methylation, and Blood Cadmium Concentrations on Renal Cell Carcinoma
Source: MDPI journal article supplement (doi:10.3390/nu15040937), 2023-02-13
Supplement: s1 [file s1]

Supplementary Materials

# Possible Combined Effects of Plasma Folate Levels, Global DNA Methylation, and Blood Cadmium Concentrations on Renal Cell Carcinoma

Chao-Yuan Huang <sup>1</sup>, Wei-Jen Chen <sup>2</sup>, Hui-Ling Lee <sup>3</sup>, Ying-Chin Lin <sup>4,5,6</sup>, Ya-Li Huang <sup>7</sup>, Horng-Sheng Shiue <sup>8</sup>, Yeong-Shiau Pu <sup>1</sup> and Yu-Mei Hsueh <sup>4,7,\*</sup>

<sup>1</sup> Department of Urology, National Taiwan University Hospital, College of Medicine National Taiwan University, Taipei City 110, Taiwan; cyhuang0909@ntu.edu.tw (C.-Y.H.); yspu@ntu.edu.tw (Y.-S.P.)

<sup>2</sup> Department of Medicine, Section of Epidemiology and Population Sciences, Baylor College of Medicine, Houston, TX 77030, USA; wei-jen.chen@bcm.edu

<sup>3</sup> Department of Chemistry, Fu Jen Catholic University, New Taipei City 242, Taiwan; 076308@mail.fju.edu.tw

<sup>4</sup> Department of Family Medicine, Wan Fang Hospital, Taipei Medical University, Taipei City 110, Taiwan; green1990@tmu.edu.tw

<sup>5</sup> Department of Family Medicine, School of Medicine, College of Medicine, Taipei Medical University, Taipei City 110, Taiwan

<sup>6</sup> Department of Occupational Medicine, Wan Fang Hospital, Taipei Medical University, Taipei City 110, Taiwan

<sup>7</sup> Department of Public Health, School of Medicine, College of Medicine, Taipei Medical University, Taipei City 110, Taiwan; ylhuang@tmu.edu.tw

<sup>8</sup> Department of Chinese Medicine, College of Medicine, Chang Gung University, Taoyuan City 333, Taiwan; hongseeng@ms1.hinet.net

\* Correspondence: ymhsueh@tmu.edu.tw; Tel.: +886-2736-1661 (ext. 6513)

**Supplementary Table S1.** Validity and reliability of the methods for determining plasma folate and vitamin B<sub>12</sub> levels as well as blood cadmium concentrations.

|                                | Instrument                                          | Detection Limit | Recovery Rate | Standard Reference Materials (SRM)                                                                                                        | Coefficient of Variance (CV) |
|--------------------------------|-----------------------------------------------------|-----------------|---------------|-------------------------------------------------------------------------------------------------------------------------------------------|------------------------------|
| Plasma folate                  | Radioassay kit (Bio-Rad, Richmond, CA) and the 1470 | 0.6 ng/mL       | -             | -                                                                                                                                         | 9.3%                         |
| Plasma vitamin B <sub>12</sub> | Wizard series gamma counter                         | 75 pg/mL        | -             | -                                                                                                                                         | 6.8%                         |
| Blood cadmium                  | Inductively coupled plasma mass spectrometry        | 0.07 µg/L       | 100 ± 20%     | SRM (Seronorm Trace Elements Whole Blood L-2 (Lot 1103129)) certificate value 5.8 µg/L (range 5.4–6.2 µg/L); 6.1 ± 0.5 µg/L in our system | < 5%                         |

**Supplementary Table S2.** Comparison of 5mdC (%) and blood cadmium concentrations between RCC cases and controls stratified by a combination of plasma folate and vitamin B<sub>12</sub> levels.

|                                                                                             | Overall                          | RCC Cases                        | Controls                         |
|---------------------------------------------------------------------------------------------|----------------------------------|----------------------------------|----------------------------------|
| High/high group for plasma folate and vitamin B <sub>12</sub> ( <i>n</i> = 237)             |                                  |                                  |                                  |
| 5mdC (%)                                                                                    | 3.16 (2.46, 4.24) <sup>a</sup>   | 2.27 (1.81, 2.62) <sup>c,e</sup> | 3.28 (2.54, 4.34) <sup>d,e</sup> |
| Blood cadmium concentrations (µg/L)                                                         | 1.30 (0.84, 2.20)                | 1.80 (1.12, 2.20) <sup>f</sup>   | 1.23 (0.78, 2.22) <sup>f</sup>   |
| Low/high or high/low groups for plasma folate and vitamin B <sub>12</sub> ( <i>n</i> = 301) |                                  |                                  |                                  |
| 5mdC (%)                                                                                    | 3.05 (2.33, 4.05) <sup>b</sup>   | 2.54 (2.10, 3.47) <sup>c,g</sup> | 3.20 (2.50, 4.16) <sup>g</sup>   |
| Blood cadmium concentrations (µg/L)                                                         | 1.32 (0.80, 2.18)                | 2.00 (1.32, 2.98) <sup>h</sup>   | 1.24 (0.74, 1.80) <sup>h</sup>   |
| Low/low group for plasma folate and vitamin B <sub>12</sub> ( <i>n</i> = 309)               |                                  |                                  |                                  |
| 5mdC (%)                                                                                    | 2.83 (2.28, 3.75) <sup>a,b</sup> | 2.45 (2.10, 3.06) <sup>i</sup>   | 3.04 (2.40, 3.97) <sup>d,i</sup> |
| Blood cadmium concentrations (µg/L)                                                         | 1.50 (0.92, 2.30)                | 1.86 (1.16, 3.28)                | 1.32 (0.82, 2.14)                |

A combination of high plasma folate (> 7.39 ng/mL) and high vitamin B<sub>12</sub> (> 532 pg/mL) was defined as the high/high group; a combination of low plasma folate (≤ 7.39 ng/mL) and high vitamin B<sub>12</sub> (> 532 pg/mL) was defined as the low/high group; a combination of high plasma folate (> 7.39 ng/mL) and low vitamin B<sub>12</sub> (≤ 532 pg/mL) was defined as the high/low groups; and a combination of low plasma folate (≤ 7.39 ng/mL) and low vitamin B<sub>12</sub> (≤ 532 pg/mL) was defined as the low/low group. Values are expressed as median (first quartile, third quartile). Kruskal-Wallis and Wilcoxon tests were conducted to compare the 5mdC (%) and blood cadmium concentrations between groups. The same letters indicate a significant difference (*p*-value < 0.05) between the two groups.
